# Supplementary material for: Epigenetic silencing of NKD2, a major component of Wnt signaling, promotes breast cancer growth
Source: PubMed Central journal article supplement (PMC4673151; doi:10.18632/oncotarget.4244), 2015-06-19
Supplement: oncotarget-06-22126-s001.pdf [file oncotarget-06-22126-s001.pdf]

## SUPPLEMENTARY FIGURE AND TABLE

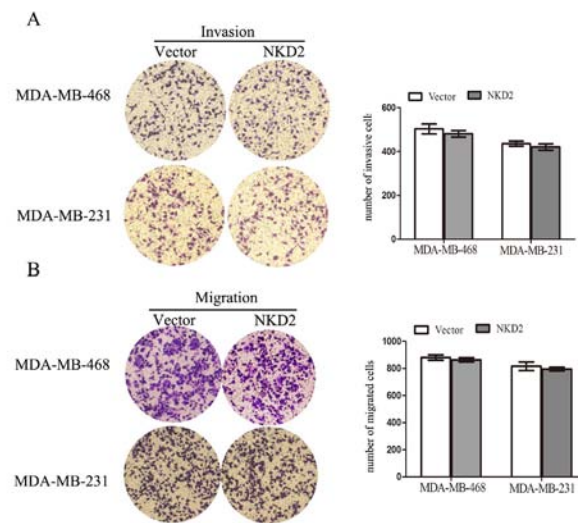

**Supplementary Figure S1: The effect of NKD2 in cell migration and invasion.** **A.** Cell invasion in NKD2 unexpressed and expressed MDA-MB-468 and MDA-MB-231 cells. The number of invasive cells is presented by bar diagram. Each experiment was repeated for three times, all  $P > 0.05$ . **B.** Cell migration in NKD2 unexpressed and expressed MDA-MB-468 and MDA-MB-231 cells. The number of migratory cells is presented by bar diagram. Each experiment was repeated for three times, all  $P > 0.05$ .

**Supplementary Table S1. RT-PCR and MSP primer sequences**

| <b>RT-PCR primers</b>                                     |
|-----------------------------------------------------------|
| NKD1- Forward: 5'-AACCACTACTTAGATCTCGCCG-3'               |
| NKD1- Reverse: 5'-GAGCCGTTGCTGGAGCTCTG-3'                 |
| NKD2- Forward: 5'-ACAGGAGGTTGTCTGCACACG-3'                |
| NKD2- Reverse: 5'-GACTTGAGGAAGTCTTCTCCG-3'                |
| GAPDH- Forward: 5'-GACCACAGTCCATGCCATCAC-3'               |
| GAPDH- Reverse: 5'-GTCCACCACCTGTTGCTGTA-3'                |
| <b>MSP primers</b>                                        |
| NKD1-M- Forward: 5'-GTTTCGGCGTTTTTCGGGCGTTAGTC-3'         |
| NKD1-U- Forward: 5'-GGGTTTGGTGTTTTTGGGTGTTAGTT-3'         |
| NKD1-M- Reverse: 5'-AAATTTCCCATACTAAAACACTACGACG-3'       |
| NKD1-U- Reverse: 5'-TAAAATTTCCCATACTAAAACACTACAACA-3'     |
| NKD2-M- Forward: 5'- GTTGTCGTCGTTGTTTTTCGCGTTTTGC-3'      |
| NKD2-U- Forward: 5'- GTTGTTGTTGTTGTTGTTTTTGTGTTTTGT-3'    |
| NKD2-M- Reverse: 5'- AAATAAAAAAAAAATAACTCCACGCCGCG -3'    |
| NKD2-U- Reverse: 5'- AAAAAATAAAAAAAAAATAACTCCACACCACA -3' |
| <b>bisulfite sequencing primers</b>                       |
| NKD2- Forward: 5'-GTTGGTGGGGTTTTAGGTTGG-3'                |
| NKD2- Reverse: 5'-AACTAAATTCTAAAACCRAAACC-3'              |
